# Supplementary material for: A CRISPR Test for Detection of Circulating Nuclei Acids
Source: PubMed Central journal article supplement — Transl Oncol. 2019 Oct 18;12(12):1566–73. doi: 10.1016/j.tranon.2019.08.011 (PMC6807067; doi:10.1016/j.tranon.2019.08.011), 2019-10-18
Supplement: mmc1.pdf [file mmc1.pdf]

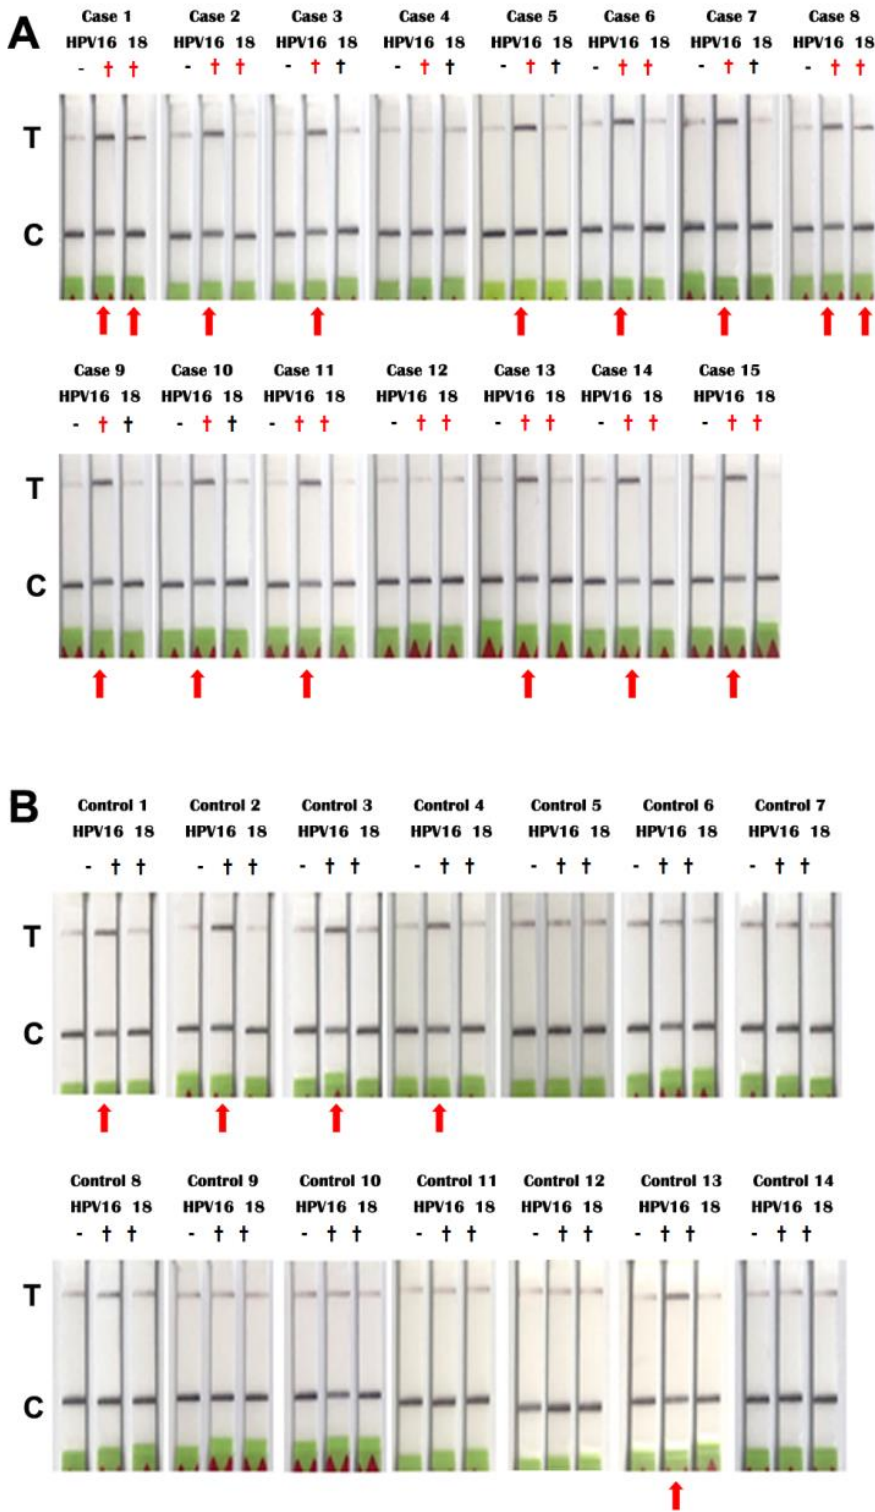

**Supplementary figure 1**

CRISPR-Cas12a-paper to detect HPV DNA in plasma specimens of 15 cervical cancer patients (A) and 14 cancer-free female individuals without any cancer (B). The red arrow indicates positive results of either HPV16 or 18.
